# Supplementary material for: Acetylation-dependent function of human single-stranded DNA binding protein 1
Source: PubMed Central journal article supplement — Nucleic Acids Res. 2015 Jul 13;43(16):7878–87. doi: 10.1093/nar/gkv707 (PMC4652753; doi:10.1093/nar/gkv707), 2015-07-13
Supplement: supp_gkv707_nar-01013-v-2015-File010.pdf [file supp_gkv707_nar-01013-v-2015-File010.pdf]

**“Acetylation-dependent function of human single-stranded DNA binding protein 1” by Wu Y et al.**

**Supplementary data**

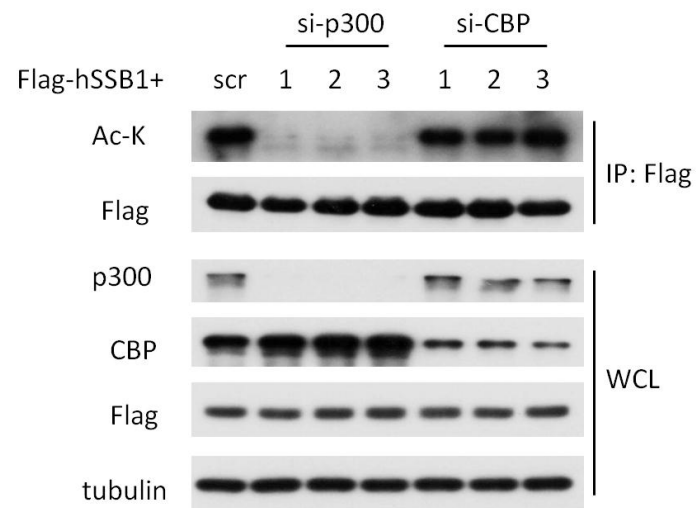

**Supplementary Fig. S1. p300 is the dominant acetyltransferase for endogenous hSSB1 in HEK293T cells.** HEK293T cells were transfected with p300 or CBP siRNAs for 24 hr, then were transfected with Flag-hSSB1 plasmid for 24 hrs to detect the acetylation levels of hSSB1.

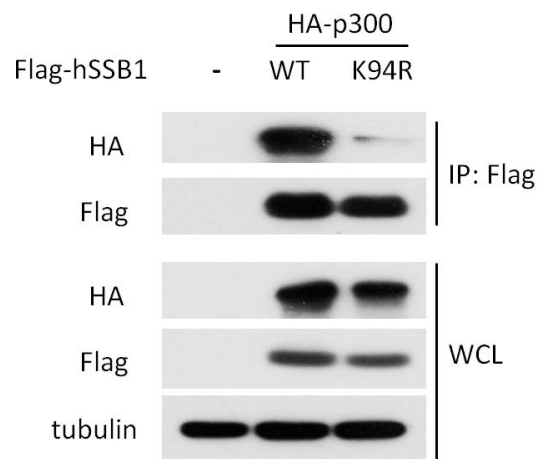

**Supplementary Fig. S2. K94R mutation diminished the interaction with p300.**

HEK293T cells cotransfected with HA-p300 with hSSB1 WT or K94R mutants as indicated for 48 hr were lysed with RIPA, and were analyzed by IP and western blotting.

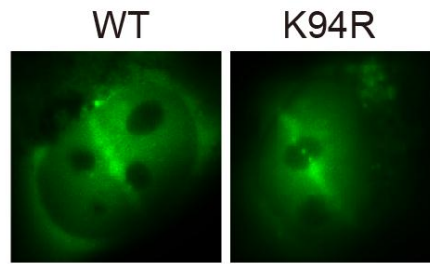

**Supplementary Fig. S3. The recruitment of hSSB1 to laser-induced DNA sites showed no difference between WT and K94R.** Live-cell fluorescence analysis of HeLa cells transiently expressing GFP-hSSB1 or GFP-hSSB1-K94R at 10 min after laser irradiation.
